# Supplementary material for: A study on the safety and efficacy of reveglucosidase alfa in patients with late-onset Pompe disease
Source: Springer Nature journal article supplement (doi:10.1186/s13023-017-0693-2), 2017-08-24
Supplement: MOESM3 [file 14239430]

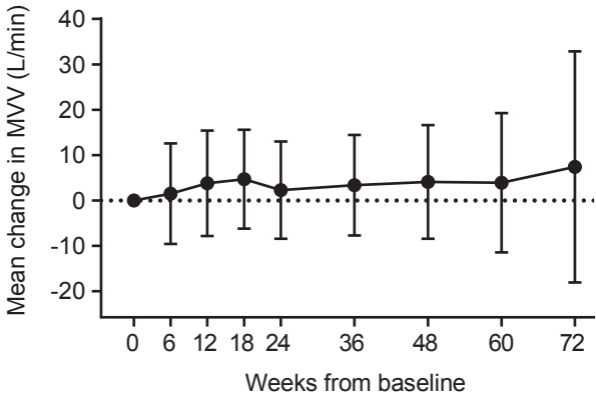

Subjects, n 16 16 16 15 15 14 15 14 14
